# Supplementary material for: Climatic variations during the Holocene inferred from radiocarbon and stable carbon isotopes in a high-alpine cave
Source: Copernicus journal article supplement (doi:10.5194/cp-2020-110), 2020-09-24
Supplement: Supplementary file [file cp-2020-110-AC1-supplement.pdf]

# Responses to referee comments on “Climatic variations during the Holocene inferred from radiocarbon and stable carbon isotopes in a high-alpine cave”

Our response is marked in blue.

We marked in yellow the questions of the referee.

## Referee #1:

Key findings that I took away from this study: The coupled methodology (novel  $^{14}\text{C}$  measurements w/ stable isotopes) reveals changes of the presence of older OM reservoirs in the karst rock above the cave through time that are attributing to changing carbon isotope signals:

1. >8ka: there is an older reservoir of OM that causes low  $^{13}\text{C}$  and high dcf. \*This interpretation wouldn't have been possible without the  $^{14}\text{C}$  measurements because low values of  $^{13}\text{C}$  alone lead to the interpretation of  $\text{C}_3$  vegetation above the cave and the measured high dcf is needed to distinguish this from the actual mechanism of vegetation + an older OM reservoirs source that is causing elevated  $\text{CO}_2$  values.

2. 3.8-8ka: There is strong  $\delta^{13}\text{C}$  variability and lower dcf. This suggests there is not an older source of OM contributing to the carbon isotope signal, and the interpretation is made it was stabilized/exhausted because of reduced precipitation. While this interpretation makes sense, I do not think bringing in growth rate is an accurate argument because I am not sure how “significant” a drop from  $19\mu\text{m}$  to  $30\mu\text{m}$  in growth rate is, and a change in growth rate could be from a variety of factors independent of precipitation amount (i.e. chemical kinetic processes, dissolved  $\text{Ca}^{2+}$  concentration, etc.). I recommend strengthening your argument on this (are their regional proxy records that suggest there was reduced precipitation amount at this time?) or removing the growth rate stance as a whole. Also, the interpretation is also made that “in-cave gas exchange processes are the most likely explanation for the strong  $^{13}\text{C}$  variability”, and bedrock dissolution/fractionation processes are ruled out. There should be clarification for what you mean by “in-cave” gas exchange processes, because right now you make this interpretation, yet right before you rule out bedrock dissolution and fractionation mechanisms. \*Also, why are the distinct isotopic changes at 5 and 6ka not discussed? At both of these times, it appears  $\delta^{18}\text{O}$  and dcf (6ka), and  $^{13}\text{C}$  and dcf (5ka) change drastically. Also at 6ka the dcf increases greatly – what could cause this? Why is this not mentioned? It definitely should be if the steady increase in dcf in the younger part of the sample is discussed (I find the sharp changes at 6-5 ka to be more significant than the younger part of the sample).

### a) Growth rate and regional proxy records

- The drop in growth rate occurred from 50 to  $30\mu\text{m}/\text{a}$ . This is a change by more than 40%, which is corroborated by several U-Th dates. In absolute numbers the change is not large, but relatively spoken it is a lot.
- We do agree that this change is likely not exclusively due to precipitation but could reflect reduced  $\text{CaCO}_3$  dissolution. We argue that the old deep OM reservoir had essentially been used up and less  $\text{CO}_2$  was available to acidify the solution, which could not dissolve  $\text{CaCO}_3$  anymore. Since we do not have additional records, which do show a reduction in prcp, we could indeed leave this away (or only speculate about it) but argue for a reduced  $\text{CaCO}_3$  dissolution due to a lower  $\text{pCO}_2$  in the skarst.

b) “In-cave” gas exchange processes: this is explained in line 396 – 398 in the manuscript: “Another process that may be dominant if the stalagmite growth rate is sufficiently low is C exchange between  $\text{CO}_2$  of the cave air and C dissolved in the drip water.”

c) We will describe this change more clearly in the revised manuscript, while admitting our ignorance about the processes leading to this. We will also stress that it remains enigmatic why  $\delta^{18}\text{O}$  and dcf change at the same time at 6 ka but not at 5ka, while for  $\delta^{13}\text{C}$  it is the temporal offset at 6ka, but a synchronous change at 5ka.

3. 2.4-3.8 ka: The more stable  $\delta_{13}\text{C}$  signature and increase in dcf suggests a contribution of aging OM reservoir. This old OM reservoir source is suggested to have been from the buildup of a mid-Holocene warm epoch. Overall, I follow this interpretation and think it makes sense. **How/why is there the rapid decay trend of F14C at 6ka?**

We will include the 6ka discussion at the appropriate section. However, we want to make sure at this point that the increase in dcf and decrease of f14C at 6 ka does not follow the 14C-decay trend. The change at 6 ka is much faster. Thus, we argue that there might be a change in the C source contributing to the rapid change. However, we have no explanation why this happens at this point. It may be related to the rapid decrease in d18O, but we are not sure.

**Comments:** Overall, I think this is a nice study and will make a worthwhile contribution to the literature. I think a future of combining novel high-resolution 14C measurements with other stable isotope data will definitely aid in the interpretation of these systems in terms of climatic processes. I think a bit of reworking with the discussion to help overall flow and clarifying several sections will result in a nice manuscript.

Some care should be taken when lumping speleothem “growth rate” with these interpretations – however, as a reduction in growth rate is not always a direct relation to reduced precipitation [i.e. changes in chemical kinetics, flow conditions (turbulent vs. laminar) could also control the growth rate of speleothems]. More of this is noted below, but this was one main issue I had with the interpretations.

I think this paper would strengthen **if there was a brief, added section on what the initial 14C (F14C) raw values can tell us, vs. what the dcf tells us.** The paper mentions what factors can contribute to dcf (lines 78-92), but it would be good to mention what the initial 14C values can tell us in this section as well. Especially because the F14C is referred to at the end of the paper (during the discussion of the youngest part of the sample, and in Fig. 6), which becomes slightly confusing because the entire paper is centered around the dcf values. I understand the distinction between the two (the use of initial 14C values to calculate for dcf) but adding a sentence to explain why you would look at raw, initial F14C values vs. dcf would be beneficial for overall flow and clarity of the manuscript and interpretations.

We will only use dcf in the new version of the manuscript.

In addition, there are **lots of data in this manuscript and I’m confused what all your study specifically measured (the radiocarbon) vs. what data** from other studies you are comparing it with (i.e. 18O, 13C? Did you all measure 13C?). I would make this clearer in the methods somewhere by stating directly: “in this study, we measured

This will be clarified at the end in the methods section.

Comments on tables & figures:

Table 1 – Why is there a “\*” after the “expected” in the table. I see no explanation of this. Also, under the “Expected\* 13C” column of the “Old OM contribution to seepage water acidification” row, does the “shift to more negative values” mean <0 or <10? If it’s closer to <10, I’d label it like that since that’s what you have in the above two rows (for consistency).

The “\*” will be removed. The shift depends a bit on whether carbonic acid dissolution occurred in an open or closed system and whether sulfuric acid dissolution was involved. We will add: (< -10 permil possible)

Figure 1: There is no ruler in this photo. It says the length in the caption, but it would be helpful to have a ruler for reference. This would especially be helpful when looking back at this figure during the discussion when you say the “old section of SPA 127 (>8,ka, >120mm)”, because then we’ll be able to go and see where in the sample this is.

We will add a ruler to the Figure.

Figure 2: Are the d13C and d18O from other studies? If so, cite the studies in the figure caption after part (C).

d18O is from another study. D13C is so far unpublished but stems from the same measurements as d18O. However, the d13C interpretation was not possible at this time due to its complicated structure. We will add the citation.

Figure 2: Also, it would be helpful to plot the age in this figure (since age is what you refer to in the discussion, not depth). You could add it by an additional x-axis on the top.

We intentionally show the F14C against the distance from top in order to plot the raw data from this new method at the beginning. In Fig. 3 we then plot the dcf against the age and only this graph is used for interpretation.

Figure 3: You mention that “12CHE” is the signal intensity in the figure caption, but nowhere in the text do you explain this further. Can you add a section somewhere that says this? It becomes confusing during the discussion section (e.g. lines 270-273), because in these sections you refer to it only as “12C”, and not 12CHE”.

“HE” will be removed.

Figure 4: What stands out to me is the jump at 6ka (increase in dcf, decrease in  $\delta_{18}O$ , and decrease in  $\delta_{13}C$ ), but this isn't mentioned in the text at all? How come?

See above. Of course we have noted this rapid and large change but have to admit, that we have no convincing explanation for this change. We will state it in a similar way in the new manuscript version (see also comment above).

Figure 4, overall comment: “the yellow, white, and orange shaded areas represent phases with distinct stable isotope and dcf characteristics” but what about the two sections (1:  $\delta_{18}O$  when dcf increases and  $\delta_{13}C$  and  $\delta_{18}O$  decreases; 2:  $\delta_{13}C$  and dcf drops)? These transitions aren't really talked about in the text, and I'm wondering why you chose not to select these areas as “phases” with distinct characteristics?

Actually, we chose these growth periods because of the stable C isotope characteristics. We will remove “dcf” here.

Figure 4c: How do you know there are not hiatuses in between the U-Th ages? For example, it appears right before an age of 4 (the yellow/white boundary in panels 4a and 4b), there is a sharp decrease in dcf, increase in  $\delta_{18}O$ , and increase in  $\delta_{13}C$ , yet this is the part of your sample that has the longest gap of age control. How do you know there's not a micro-hiatus here that's undetectable? It may be worth mentioning you can't rule this hypothesis out, just to cover your bases and to let readers know you thought of this (rather than just interpreting this as a purely real signal). Also, the U-Th ages need error plotted.

We can exclude a long-lasting hiatus, even if the U-Th age determinations are sparse in this section. First, there is no macroscopic hint for this. In the whole section there is no distinct layer that potentially could point to a growth stop. Second, this part of SPA127 grew in parallel to speleothems SPA12 and SPA128, which were dated by  $\sim 10$  points in this interval (Fohlmeister et al., 2013). None of the other two stalagmites shows a growth stop. The good correlation between the d18O signal of those three speleothems, thus, indicates that also no growth stop occurred in SPA127. However, we cannot exclude a microhiatus, although it appears very unlikely. But even if there is a microhiatus, this will have virtually no effect on the initial F14C or dcf. For example: an undetected ‘microhiatus’ of 100 years (which is already quite long, but could be missed as derived by the small age errors and good match with d18O of other speleothems) will force f14C initial values to be off by 0.01 or in DCF by between 0.5 and 1 %. This is negligible compared to the change in DCF in this speleothem section. Thus we prefer not to discuss this topic at length in the revised manuscript, however, we will add U-Th error bars in Fig. 4 and state in section ‘Materials and Methods’ in subsection ‘Sample’ that hiatus are very unlikely and provide the above explanation.

Comments by line:

Line 83-85: You mention the conditions in both an “open vs. closed” system can affect the dcf, but you only describe how the dcf typically is in an open system. I suggest adding a sentence describing what dcf would be in a closed system for clarity. Also detailing how there could be a change from an open to closed system may be helpful. I see you outline it in Figure 5, and also in Table 1, so perhaps just simply referencing these two figures/tables will help streamline this discussion.

We will change the manuscript accordingly.

Line 88-92: "Several studies show more closed-system conditions under higher precipitation regimes" maybe reword this sentence because I'm not sure what exactly you mean by it. What constitutes "more closed-system" conditions? Once again, perhaps by referencing either Table 1 or Figure 5 this would help.

We will change the manuscript accordingly and explain better what is meant by this.

Line 136: How do you know there aren't hiatuses present in your speleothem? Perhaps briefly state how you approached assessing hiatuses in your sample here. Also what is the error on each age? I don't see this stated anywhere, and it's not in Figure 4C. The error should be plotted.

See above.

Line 162-163: "offset between stable isotope and radiocarbon data of up to several hundred micrometers", how did you go about accounting for this? Perhaps briefly describe what you did to account for this offset so readers are aware of your methodology. \*I see in line 350 that you are unable to apply a correction factor. Perhaps stating this earlier (such as at line 162-163) will help the reader better understand your process of approaching this.

We will explain how we estimated this offset. It mainly arises from the spatial offset of the LA-AMS tracks to the stable isotope tracks. Growth layers are not linear and can be significantly distorted as we have seen from recent studies with our system. However, with our current LA cell, we cannot place the tracks closer to the edge of the sample. As suggested by the reviewer, we will also explain why we cannot apply a correction for both tracks (L162-163).

Line 193: It should be stated in the first sentence or two what you used this technique for. Example, directly stating: "FTIR was used for: : :.", because right now it is unclear why you used FTIR (it's not until later in the discussion when you explain identifying the contaminated epoxy area, and I think it'd be better to state up front in this section).

We will change the manuscript accordingly.

Line 276: "it's exact composition has been determined using FTIR". It is not until this sentence that I realize what you are using FTIR for. Perhaps add a sentence to the FTIR section (the section starting at line 193) that states, "we use FTIR to determine specific compositions of areas in our sample to clarify the causes of anomalies."

See above.

Line 243: "For the more than 1500 radiocarbon data points", I suggest just inserting the exact number of data analysis points that you have here, instead of saying "more than.."

We will change the manuscript accordingly.

Line 259: Please add a reference at the end of this sentence to let readers know where the "previously published 18O values" can be found. Also, did you measure the 13C values in this study? Or did you pull data from another study? This is unclear and should be clarified.

We state in the materials and methods section what we analyzed in this study. But as stated above, we will add this to the introduction.

Line 265: I think this paragraph could be reworded so it's clearer. I'm a bit confused about how the different sections of the discussion are broken up the way they are. A suggestion: section "1. LA-AMS anomalies in the old section of : : :." should be an entirely separate section than the ones below, because it just details how the presence of epoxy caused contamination, and there are no other interpretations of the data associated with it. This entire section be a brief paragraph at the start of the discussion section, and then you could transition into a "part II" of the discussion that's exclusively about the interpretation of the isotope systems across different parts of the sample.

We will move the epoxy discussion to the SI as suggested by Referee #2.

Line 266: A suggestion to clarify this sentence: "...in the bottom part of the sample"

We will change the manuscript accordingly.

Line 270: Please add the reference to Figure 3 after this sentence: "The five 12C current peaks correlating with: : (Figure 3)" so the readers know this is what you're referencing. Also change "indicating" to "indicate".

We will change the manuscript accordingly.

Lines 300, 328, 335, 337, 339, 396, 397: Change "C" to "C-isotope". I probably missed additional places you refer to just "C", so please change everywhere this occurs.

We will change the manuscript accordingly.

Comment on section “2. Old section of SPA (>8 ka BP) (Line 293-315): The first paragraph of this section (line 294-309) walks readers through interpretations of high dcf values and low  $\delta^{13}C$  values from >8ka. A transitional sentence is needed in the beginning part of the second paragraph (lines 310-315), to set up the connection of the two (i.e. the warmer temperatures for the Holocene could have caused the mobilization of the older OM), because right now it feels out of place a bit. Also adding a concluding sentence would be beneficial to wrap up this section of the discussion.

We will change the manuscript accordingly.

Line 319: Perhaps state at what depth/age you are referring to here in this sentence. For example: “As indicated by the reduced growth rate in SPA 127 (Fig. 4, 3.8 ka)..”

We will change the manuscript accordingly.

Line 320: Misspell of “precipitation” (it says “recipitatin”).

We will change the manuscript accordingly.

Line 321: Please add this to the sentence for clarity: “The low  $\delta^{13}C$  -values of the first growth period are superseded by rapid and very large variations of  $\delta^{13}C$ .”

We will change the manuscript accordingly.

Line 325-328: You state here “the dcf between 3.8 and 8 ka is generally lower than the older section: but at 5.8-6ka dcf jumps relatively high and stays high until 5.2 ka. I think this should be addressed somewhere in your discussion.

We will add this to the discussion, although we cannot explain what might have caused this change (see above).

Line 343, 392: what is (Fig A7?) Do you mean supplemental Figure 7 (Fig S7)?

Yes. This will be changed accordingly.

Line 330: Hypothesis 1, general comments –

Line 351: “a positive correlation between main features of  $\delta^{13}C$  and dcf are observable for the middle period, especially between 3.8-5 ka and 6-8 ka BP.” I would argue @ 4ka they appear reversed, but 6-8ka I believe I see this correlation. A suggestion: zoom in on these two time slices for what’s plotted in Figure 4B, especially the 6-8 ka one, so the correlation is clearer (the blue and orange lines are kind of on top of each other in the figure now so it’s hard to see). The argument for this could be stronger if you could demonstrate the relationship more clearly.

We will add such a zoom in the Figure.

Line 354: A bit more explanation for why “an increase of the dcf to 100%” is needed for this mechanism to work would help the flow of this argument better.

Because there wouldn’t be any modern  $\delta^{14}C$  signature from the soil, only old bedrock carbon. We will add a sentence here.

Line 355: “Generally, the dcf is even smaller than in the youngest and oldest section of the stalagmite..” What about at from 6-5ka? This need addressed.

See above.

Line 354: “..this is expected to be accompanied by an increase of the dcf to 100%.” Why? Some elaboration on this would strengthen your argument.

Will be added. See above.

Line 362: Hypothesis 2, general comments – Overall the text in the discussion of this hypothesis is clear. But I disagree with your growth rate argument. As stated in previous comments, I’m not sure if a change in the growth rate (19 $\mu\text{m}/11\text{ka}$  to 30 $\mu\text{m}$ ) is “significant” – I consider this just a “lower” growth rate. I therefore don’t think you can use this piece of information to suggest it was caused by an overall reduction in precipitation amount. I think you should either try to bring in literature that demonstrate regional drier conditions, or some other support for this argument other than growth rate.

We will replace significant by a relative number of change e.g. 30 to 60% reduction in growth rate. We agree that a reduction in growth rate is not the only potential reason and there are multiple ways to interpret this signal: 1) less precipitation and 2) an exhausted OM reservoir. We will discuss both options because we think, a reduction in prcp could be very well responsible for the decrease in growth rate. Alternatively, there was reduced contribution of the decreased OM to the acidification

of the solution in the karst, which resulted in lower  $\text{Ca}^{2+}$  concentrations. This has the same effect as a lower growth rate. We will modify this hypothesis in the next version.

Lines 395-427: I'm a bit confused with this paragraph. I follow your discussion, but are you saying this is your main interpretation for what is happening during this interval and causing all the fluctuations? (i.e. is this what you mean by "in-cave" processes). You state in the conclusion that it's not bedrock dissolution or fractionation processes, so are you interpreting the strong variability in  $^{13}\text{C}$  as a change of gas exchange processes? If so, this needs to be stated clearer, because right now it's a bit ambiguous whether you mean this or not.

Yes, this is exactly what we mean and we will state this in a clearer way.
